# Supplementary material
Source: PubMed Central journal article supplement (PMC5647228)
Supplement: NIHMS895357-supplement-Figure_S2.pdf [file NIHMS895357-supplement-Figure_S2.pdf]

## Supplemental Figure S2

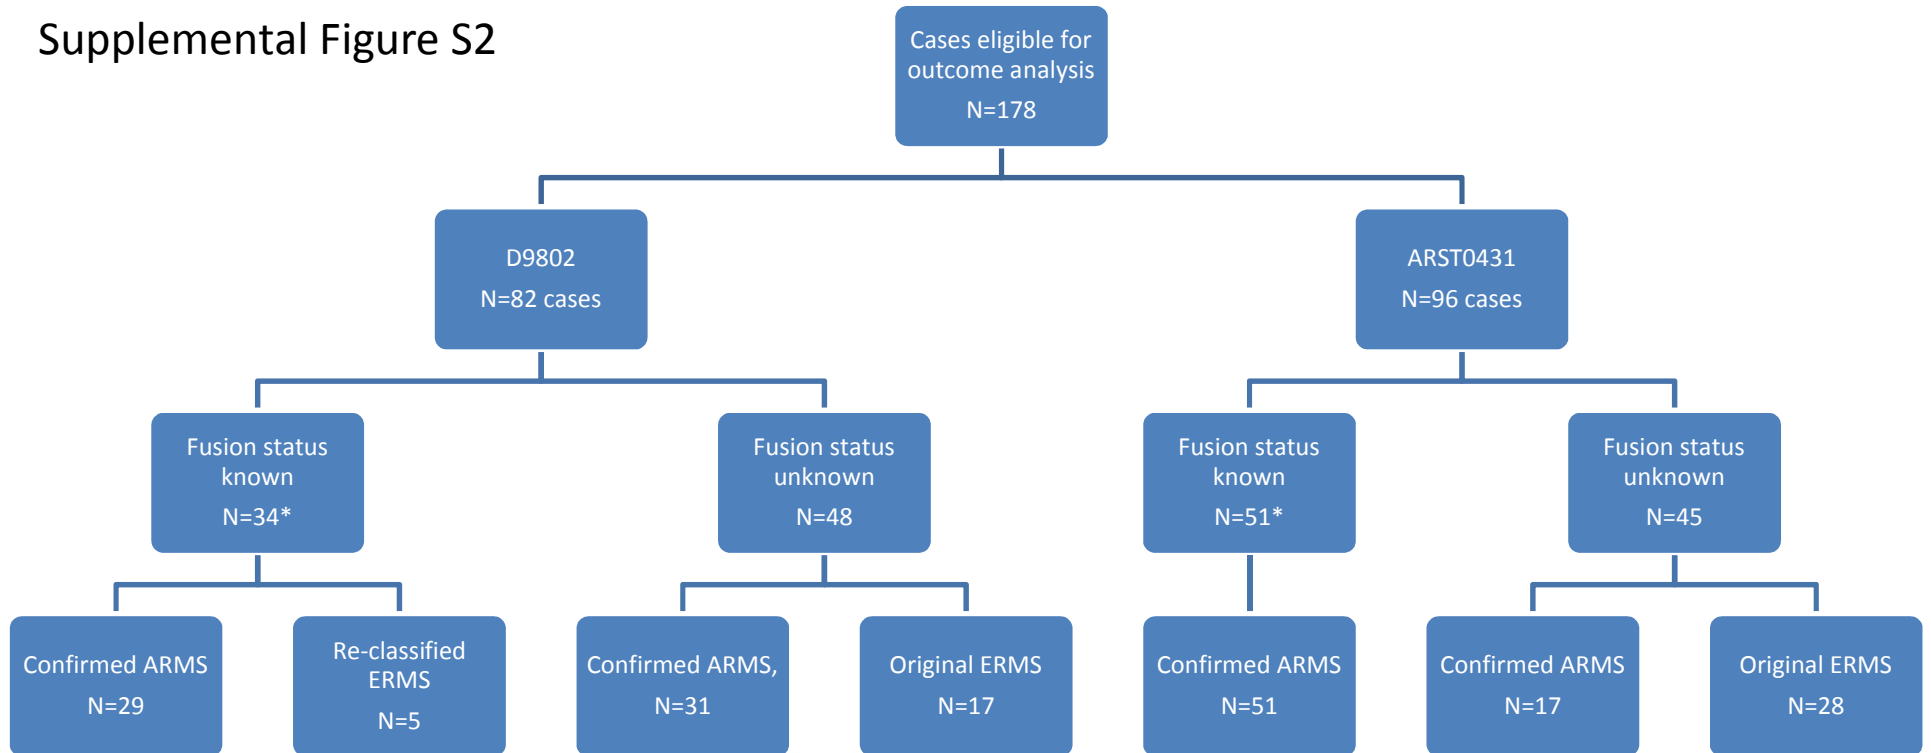

\* 2 RMS,NOS with known fusion status excluded from outcome analysis (one from D9802 and one from ARST1431)
