# Supplementary material
Source: PubMed Central journal article supplement (PMC5647228)

# Supplemental Figure S1

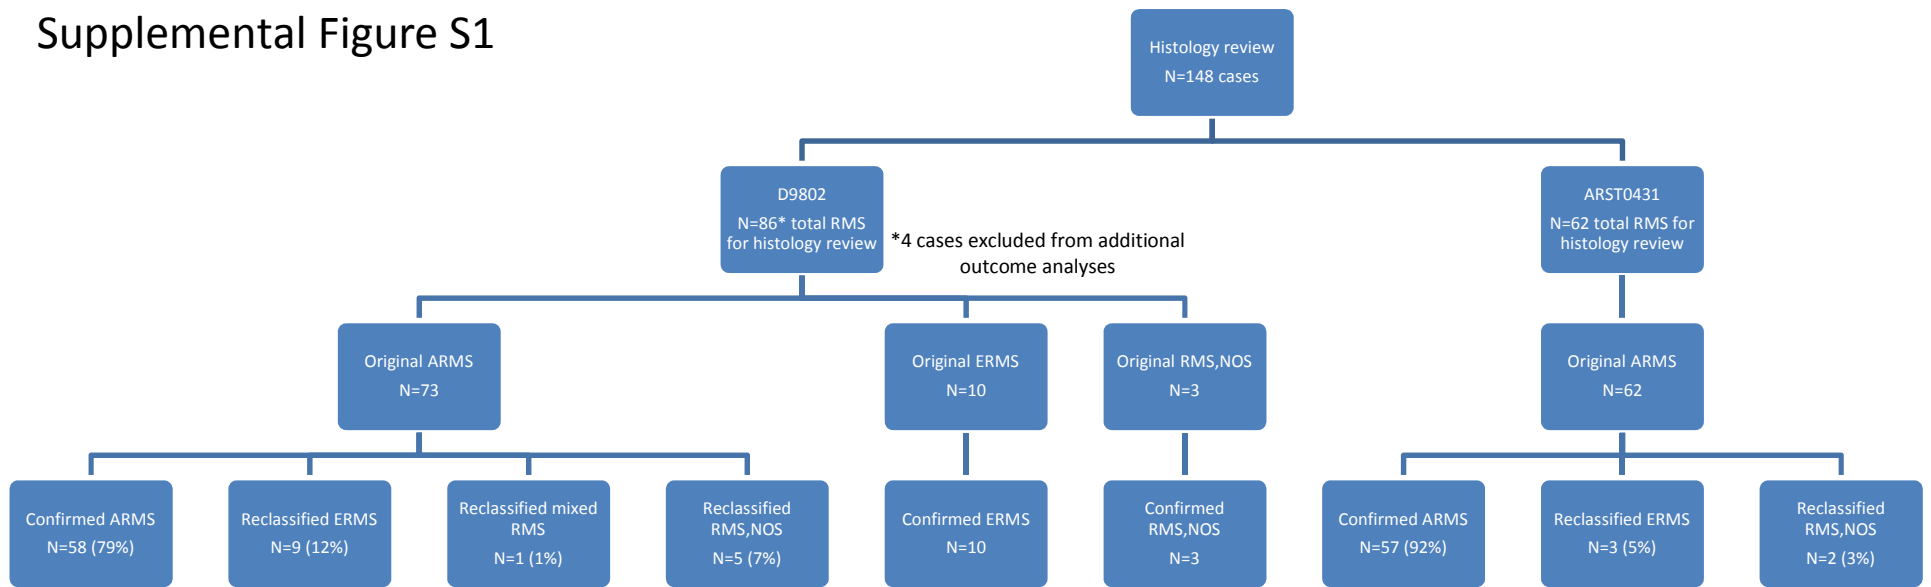

Supplement: NIHMS895357-supplement-Figure_S1.pdf [file NIHMS895357-supplement-Figure_S1.pdf]
